# Supplementary material for: Comparison of Chicken Immune Responses to Immunization with Vaccine La Sota or ZG1999HDS Strain of Newcastle Disease Virus
Source: MDPI journal article supplement (doi:10.3390/life12010072), 2022-01-05
Supplement: s1 [file s1]

# Supplementary material of Comparison of Chicken Immune Responses to Immunization with Vaccine La Sota or ZG1999HDS Strain of Newcastle Disease Virus

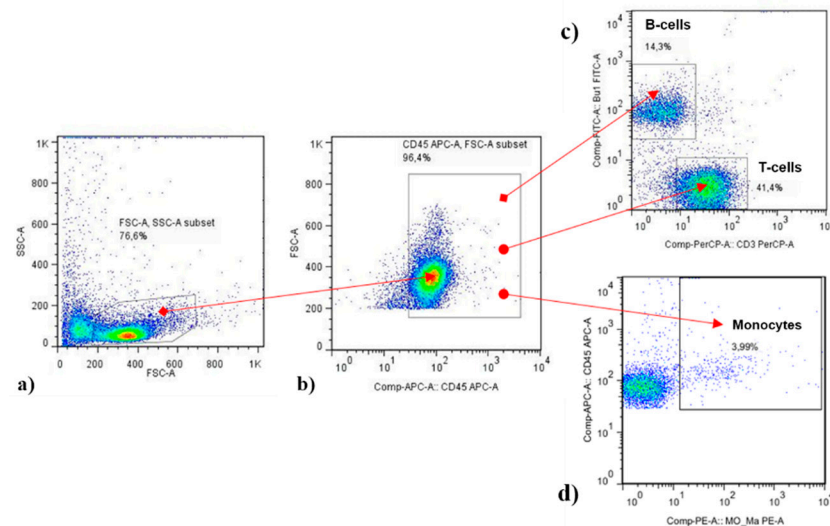

**Figure S1.** Gating strategy for L-panel. Representative gating strategy for immunophenotyping of chicken PBMC Doublets, debris, and dead cells were excluded from total cells according to L-panel (see in Materials and methods) from mononuclear cells acquired by BD LSRII cytometer. Based on cell size and granularity, gate was placed around mononuclear corresponding- cells, i.e. PBMCs (**Figure S1 a**) and they were additionally confirmed as CD45<sup>+</sup> cells (leucocytes) (**Figure S1 b**). Mononuclear leukocytes were further differentiated based on the specific markers expression: Bu-1 for B-cells and Mo/Mf for monocytes (**Figure S1.c**), and CD3 for T-cells (**Figure S1.d**).

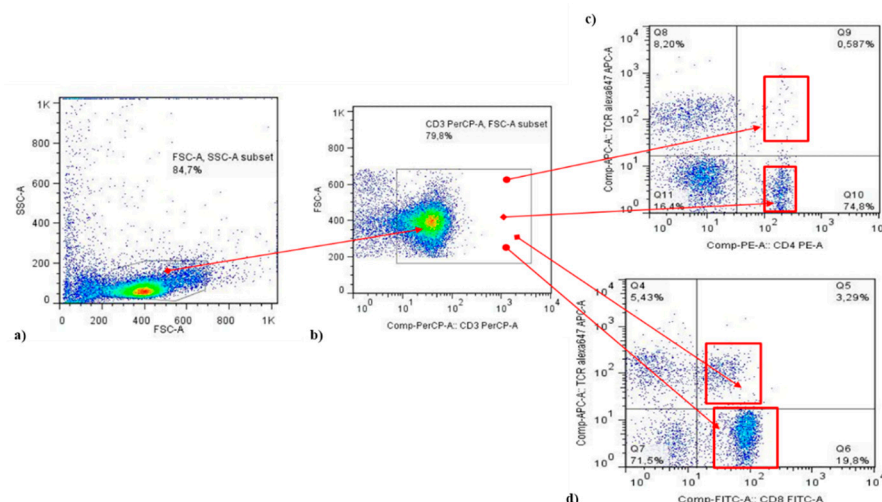

**Figure S2.** Gating strategy for T-panel. Representative gating strategy for T-cell subpopulations analysis. Mononuclear cells corresponding to lymphocytes were selected based on cell size and granularity (**Figure S2 a**) and T-cells identified as CD3<sup>+</sup> (**Figure S2 b**). Subpopulations of T-cells were separated based on the expression of specific markers: TCR1<sup>+</sup> for  $\gamma\delta$ TCR subpopulation of T-lymphocytes and CD4<sup>+</sup> for helper (-Th-) or CD8<sup>+</sup> for cytotoxic T-cells (CTL). (**Figure S2 c & d**). The relative percentages of the  $\alpha\beta$ TCR<sup>+</sup> T-cell subpopulation was determined as CD3<sup>+</sup>TCR1<sup>+</sup> (non- $\gamma\delta$  T-cells).
